# Supplementary material for: A PPO Promoter from Betalain-Producing Red Swiss Chard, Directs Petiole- and Root-Preferential Expression of Foreign Gene in Anthocyanins-Producing Plants
Source: PubMed Central journal article supplement (PMC4661869; doi:10.3390/ijms161126011), 2015-11-12
Supplement: ijms-16-26011-s001.pdf [file ijms-16-26011-s001.pdf]

# Supplementary Materials: A PPO Promoter from Betalain-Producing Red Swiss Chard, Directs Petiole- and Root-Preferential Expression of Foreign Gene in Anthocyanins-Producing Plants

Zhi-Hai Yu, Ya-Nan Han and Xing-Guo Xiao

Table S1. Motif analysis of *BvcPPOP* promoter.

| Motif Identity  | Motif Sequence | Sense Strand | Antisense Strand |
|-----------------|----------------|--------------|------------------|
| CACTFTPPCA1     | YACT           | 17           | 16               |
| DOFCOREZM       | AAAG           | 20           | 6                |
| CAATBOX1        | CAAT           | 16           | 8                |
| EBOXBNNAPA      | CANNTG         | 10           | 10               |
| MYCCONSENSUSAT  | CANNTG         | 10           | 10               |
| GT1CONSENSUS    | GRWAAW         | 11           | 9                |
| GTGANTG10       | GTGA           | 11           | 6                |
| ARR1AT          | NGATT          | 4            | 12               |
| GATABOX         | GATA           | 5            | 10               |
| POLLEN1LELAT52  | AGAAA          | 10           | 5                |
| ROOTMOTIFTAPOX1 | ATATT          | 10           | 4                |
| WRKY71OS        | TGAC           | 7            | 6                |
| IBOX            | GATAAG         | 7            | 3                |
| TAAAGSTKST1     | TAAAG          | 6            | 2                |
| ACGTATERD1      | ACGT           | 6            | 2                |
| POLASIG3        | AATAAT         | 5            | 2                |
| IBOXCORE        | GATAA          | 3            | 4                |
| TATABOX5        | TTATT          | 2            | 5                |
| BIHD1OS         | TGCA           | 4            | 3                |
| CARGCW8GAT      | CWWWWWWWWG     | 3            | 3                |
| WBOXHVIS01      | TGACT          | 3            | 2                |
| WBOXNTERF3      | TGACY          | 3            | 2                |
| MYBCORE         | CNGTTR         | 1            | 4                |
| NTBBF1ARROLB    | ACTTTA         | 2            | 3                |
| RAV1AAT         | CAACA          | 4            | 1                |
| GT1GMSCAM4      | GAAAAA         | 4            | 1                |
| CURECORECR      | GTAC           | 2            | 2                |
| MYBST1          | GGATA          | 1            | 3                |
| MYBCOREATCYCB1  | AACGG          | 1            | 3                |
| CCAATBOX1       | CCAAT          | 3            | 1                |
| GAREAT          | TAACAAR        | 3            | 1                |
| POLASIG2        | AATAAA         | 2            | 1                |
| MYBGAHV         | TAACAAA        | 2            | 1                |
| AMYBOX1         | TAACARA        | 1            | 2                |
| TATABOX2        | TATAAAT        | 1            | 2                |
| OSE2ROOTNODULE  | CTCTT          | 1            | 2                |
| NODCON2GM       | CTCTT          | 1            | 2                |
| ECCRCAH1        | GANTTNC        | 2            | 1                |
| RHERPATEXPA7    | KCACGW         | 3            | 0                |
| ABRELATERD1     | ACGTG          | 1            | 2                |
| SEF4MOTIFGM7S   | RTTTTTR        | 1            | 2                |
| REALPHALGLHCB21 | AACCAA         | 1            | 1                |
| REBETALGLHCB21  | CGGATA         | 0            | 2                |

Table S1. *Cont.*

| Motif Identity     | Motif Sequence | Sense Strand | Antisense Strand |
|--------------------|----------------|--------------|------------------|
| WBOXATNPR1         | TTGAC          | 2            | 0                |
| MYB1AT             | WAACCA         | 1            | 1                |
| REBETALGLHCB21     | CGGATA         | 0            | 2                |
| LTRECOREATCOR15    | CCGAC          | 1            | 1                |
| CPBCSPOR           | TATTAG         | 0            | 2                |
| GT1CORE            | GGTAA          | 1            | 1                |
| OSE1ROOTNODULE     | AAAGAT         | 2            | 0                |
| RBCSCONSENSUS      | AATCCAA        | 2            | 0                |
| INRNTPSADB         | YTCANTYY       | 1            | 1                |
| ACGTABOX           | TACGTA         | 1            | 1                |
| -300ELEMENT        | TGHAAARK       | 2            | 0                |
| ERELEE4            | AWTTCAAA       | 0            | 2                |
| ABRERATCAL         | MACGYGB        | 1            | 1                |
| MYCATERD1          | CATGTG         | 1            | 1                |
| MYCATRD22          | CACATG         | 1            | 1                |
| MARTBOX            | TTWTWTTWTT     | 0            | 2                |
| SV40COREENHAN      | GTGGWWHG       | 0            | 2                |
| TATCCAOSAMY        | TATCCA         | 1            | 1                |
| CACGTGMOTIF        | CACGTG         | 1            | 1                |
| TATABOX3           | TATTAAT        | 0            | 1                |
| ASF1MOTIFCAMV      | TGACG          | 1            | 0                |
| CEREGUBOX2PSLEGA   | TGAAAAC        | 1            | 0                |
| WBBOXPCWRKY1       | TTTGACY        | 1            | 0                |
| GCN4OSGLUB1        | TGAGTCA        | 0            | 1                |
| CAREOSREP1         | CAACTC         | 1            | 0                |
| BOXCPSAS1          | CTCCCAC        | 1            | 0                |
| MYB2CONSENSUSAT    | YAACKG         | 0            | 1                |
| CCA1ATLHCB1        | AAMAATCT       | 0            | 1                |
| IBOXCORENT         | GATAAGR        | 0            | 1                |
| MYB1LEPR           | GTTAGTT        | 1            | 0                |
| CTRMCAMV35S        | TCTCTCTCT      | 0            | 1                |
| T/GBOXATPIN2       | AACGTG         | 0            | 1                |
| WUSATAg            | TTAATGG        | 0            | 1                |
| SP8BFIBSP8BIB      | TACTATT        | 0            | 1                |
| NAPINMOTIFBN       | TACACAT        | 0            | 1                |
| L1BOXATPDF1        | TAAATGYA       | 1            | 0                |
| SEF3MOTIFGM        | AACCCA         | 0            | 1                |
| SORLIP5AT          | GAGTGAG        | 0            | 1                |
| SEBFCONSSTPR10A    | YTGTCWC        | 0            | 1                |
| SREATMSD           | TTATCC         | 0            | 1                |
| TBOXATGAPB         | ACTTTG         | 1            | 0                |
| TGTCACACMCUCUMISIN | TGTCACA        | 0            | 1                |
| DRE1COREZMRAB17    | ACCGAGA        | 1            | 0                |
| -10PEHVPSBD        | TATTCT         | 1            | 0                |
| BOXIINTPATPB       | ATAGAA         | 0            | 1                |
| CIACADIANLELHC     | CAANNNNATC     | 1            | 0                |
| ANAERO2CONSENSUS   | AGCAGC         | 1            | 0                |

Table S1. *Cont.*

| Motif Identity        | Motif Sequence                | Sense Strand | Antisense Strand |
|-----------------------|-------------------------------|--------------|------------------|
| PRECONSCRHSP70A       | SCGAYNRNNNNNNN<br>NNNNNNNNNHD | 0            | 1                |
| IRO2OS                | CACGTGG                       | 1            | 0                |
| DRECRTCOREAT          | RCCGAC                        | 0            | 1                |
| CBFHV                 | RYCGAC                        | 0            | 1                |
| PYRIMIDINEBOXOSRAMY1A | CCTTTT                        | 0            | 1                |
| TATCCAYMOTIFOSRAMY3D  | TATCCAY                       | 1            | 0                |
| TATCCACHVAL21         | TATCCAC                       | 1            | 0                |
| TATAPVTRNALEU         | TTTATATA                      | 0            | 1                |
| TATABOX4              | TATATAA                       | 1            | 0                |

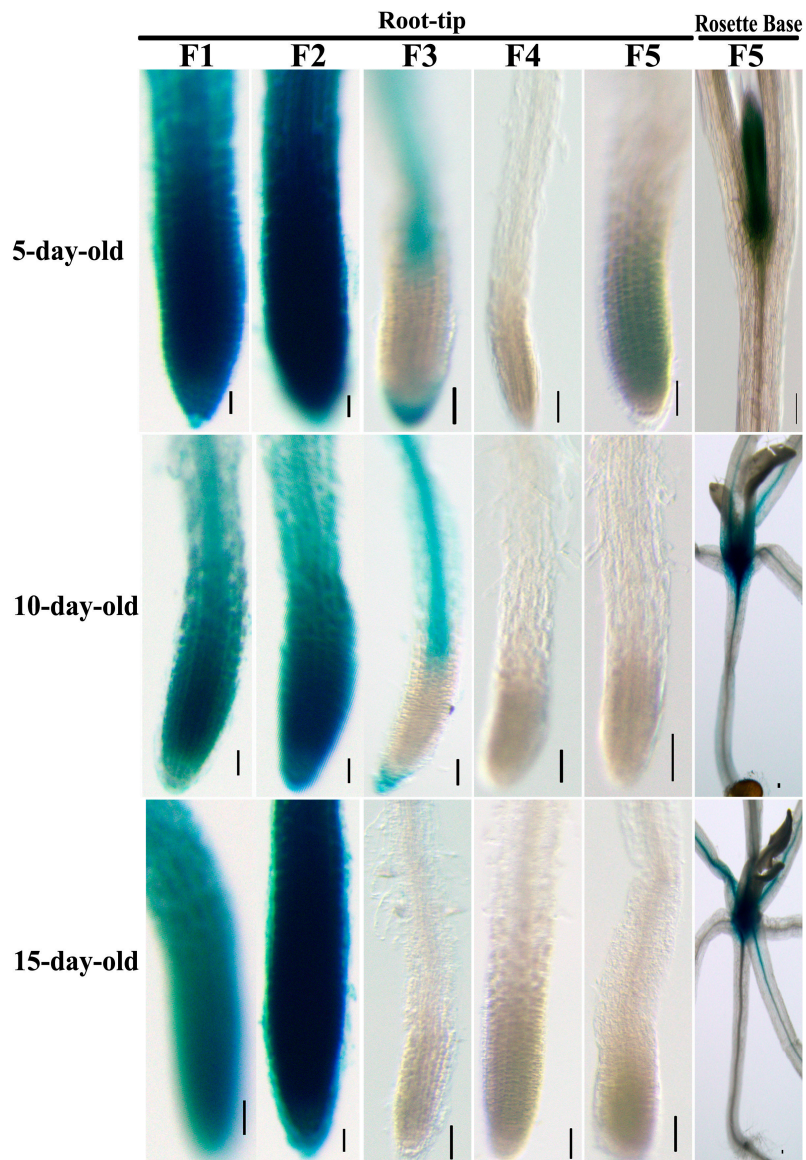

**Figure S1.** The enlargement of root-tip and rosette base (only for F5) of GUS staining T<sub>3</sub> Arabidopsis. Bar = 100 µm.

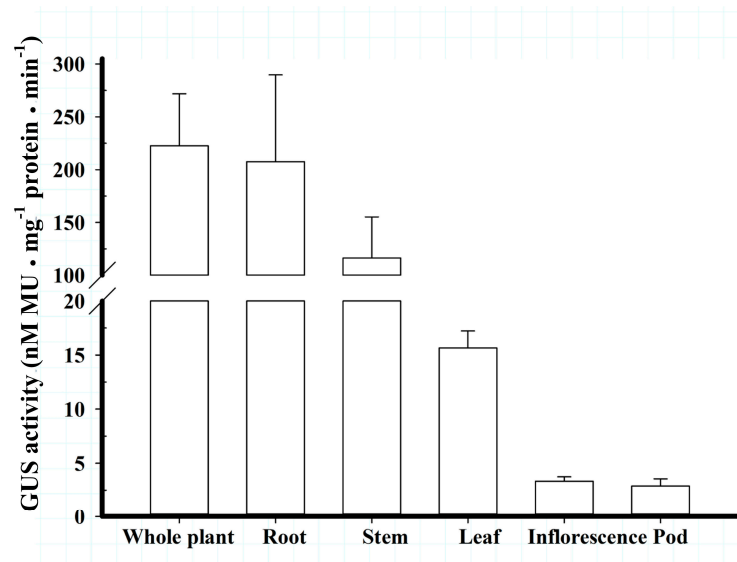

**Figure S2.** GUS activities of different parts of T<sub>3</sub> *BvcPPOP-GUS* transgenic *Arabidopsis* after anthesis. Data are shown as the means ± SD (*n* = 3).

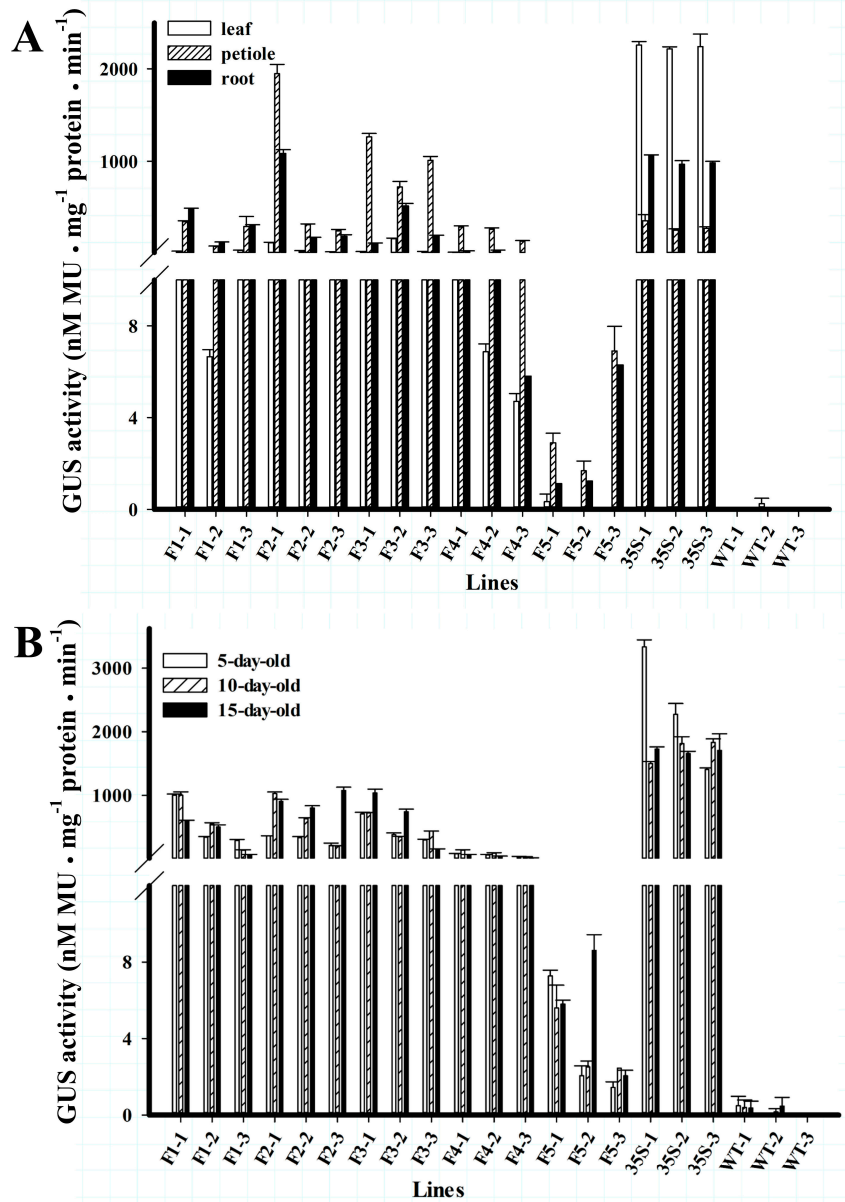

**Figure S3.** GUS activities of T<sub>3</sub> Arabidopsis. Data are shown as mean value of three replicates for each line  $\pm$  SD. Three independent lines of each construct are present. (A) The GUS activity measured in root, petiole and leaf of 15-day-old different constructs transgenic seedlings; (B) The GUS activity driven by serial 5'-truncated *BvcPPOPs* and *CaMV 35S* as well as WT control in different developmental stages.
